# Supplementary material for: Using routine healthcare data to evaluate the impact of the Medicines at Transitions Intervention (MaTI) on clinical outcomes of patients hospitalised with heart failure: protocol for the Improving the Safety and Continuity Of Medicines management at Transitions of care (ISCOMAT) cluster randomised controlled trial with embedded process evaluation, health economics evaluation and internal pilot
Source: HighWire-hosted journal article supplement (doi:10.1136/bmjopen-2021-054274), 2022-04-01
Supplement: bmjopen-2021-054274supp001_data_supplement.pdf [file bmjopen-2021-054274supp001_data_supplement.pdf]

## MaTI Form A

### Checklist for MaTI patients

Keep this checklist in the MaTI box file in the agreed place on the ward

Patient name: \_\_\_\_\_

DoB: \_\_\_\_\_ NHS number: \_\_\_\_\_

## MaTI Form A

### Checklist for MaTI patients

FOR STUDY USE ONLY

INITIALS

DOB

TRIAL No.

SITE NAME

SITE No.

| Step                                                                                             | Description and tool used                                                                                                                 | When?                                      | Date completed | Who? (role, initials) | Unable to complete (reason) |
|--------------------------------------------------------------------------------------------------|-------------------------------------------------------------------------------------------------------------------------------------------|--------------------------------------------|----------------|-----------------------|-----------------------------|
| <b>1</b><br>  | MaTI checklist in patient's notes                                                                                                         | During admission                           |                |                       |                             |
| <b>2a</b><br> | Identify community pharmacist (Pharmacy form to include in notes)                                                                         | During admission/ medicines reconciliation |                |                       |                             |
| <b>2b</b><br> | Contact the pharmacist to let them about the patient and discharge information                                                            |                                            |                |                       |                             |
| <b>3</b><br>  | Patient introduced to the My Medicines Toolkit booklet (MaTI booklet)                                                                     | Before the day of discharge                |                |                       |                             |
| <b>4</b><br>  | Discharge heart failure medicines log completed (foldout in MaTI toolkit)                                                                 | On day of discharge                        |                |                       |                             |
| <b>5</b><br>  | Patient informed about being referred to their community pharmacy for a follow up and a medicines use review / discussion about medicines | On day of discharge                        |                |                       |                             |
| <b>6</b><br>  | Transfer the patient's discharge advice letter and medicines list to the community pharmacy (MaTI community pharmacy cover letter)        | At / soon after discharge                  |                |                       |                             |
| <b>7</b><br>  | Information has been received by the community pharmacist? (by telephone)                                                                 | At / soon after discharge                  | Y/ N           |                       |                             |
