# Supplementary material for: Using routine healthcare data to evaluate the impact of the Medicines at Transitions Intervention (MaTI) on clinical outcomes of patients hospitalised with heart failure: protocol for the Improving the Safety and Continuity Of Medicines management at Transitions of care (ISCOMAT) cluster randomised controlled trial with embedded process evaluation, health economics evaluation and internal pilot
Source: HighWire-hosted journal article supplement (doi:10.1136/bmjopen-2021-054274), 2022-04-01
Supplement: bmjopen-2021-054274supp002_data_supplement.pdf [file bmjopen-2021-054274supp002_data_supplement.pdf]

**MaTI Form B**  
**Community pharmacy record**

Date: \_\_\_\_\_

Patient name: \_\_\_\_\_

DoB: \_\_\_\_\_

**MaTI Form B**  
**Community pharmacy record**

*FOR STUDY USE ONLY*

INITIALS

DOB

TRIAL No.

SITE NAME

SITE No.

Date: \_\_\_\_\_

Community pharmacy name: \_\_\_\_\_

Community pharmacy address: \_\_\_\_\_

\_\_\_\_\_

\_\_\_\_\_

\_\_\_\_\_

Phone: \_\_\_\_\_

Fax: \_\_\_\_\_

Secure NHS email: \_\_\_\_\_
